# Supplementary material
Source: publisher figshare collection journal article supplement (https://acs.figshare.com/ndownloader/files/26204487)
Supplement: Supplementary file 1 [file 26204487]

# Supporting Information

## Boosting the output performance of triboelectric nanogenerator through the nonlinear oscillator

Dong Guan<sup>a, b</sup>, Guoqiang Xu<sup>a</sup>, Xin Xia<sup>a</sup>, Jiaqi Wang<sup>a</sup>, Yunlong Zi<sup>a, \*</sup>

*<sup>a</sup>Department of Mechanical and Automation Engineering, The Chinese University of Hong Kong, Shatin, N. T., Hong Kong, China*

*<sup>b</sup>College of Mechanical Engineering, Yangzhou University, Yangzhou, 225127, China*

\*Corresponding author at: Department of Mechanical and Automation Engineering, The Chinese University of Hong Kong, Shatin, N. T., Hong Kong, China

E-mail addresses: [ylzi@cuhk.edu.hk](mailto:ylzi@cuhk.edu.hk)

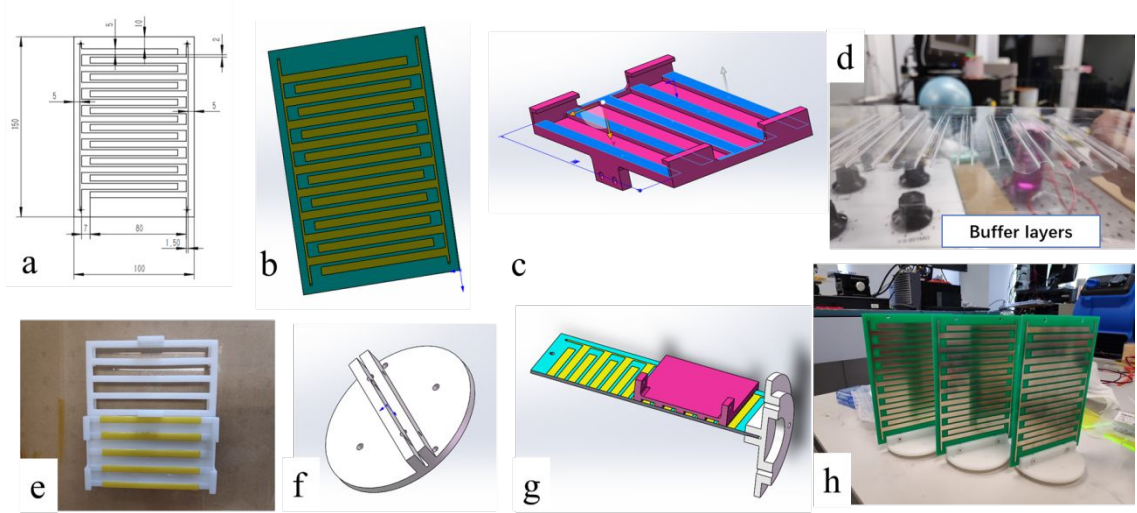

Figure S1. (a) The drawing of PCB. (b) The 3D plot of PCB. (c) The 3D plot of slider. (d) The fabricated slider with FEP membrane. (e) The 3D printed slider. (f) The 3D plot of mount base. (g) The schematic of NL-TENG. (h) The fabricated PCB and mount base.

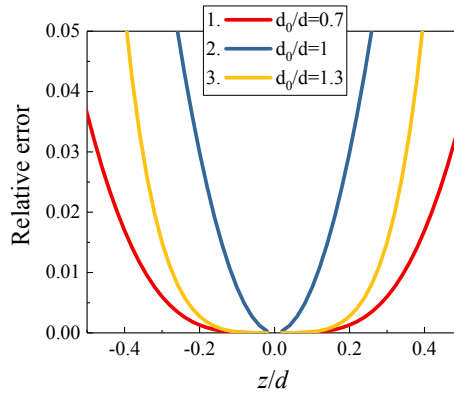

Figure S2. Relative error.

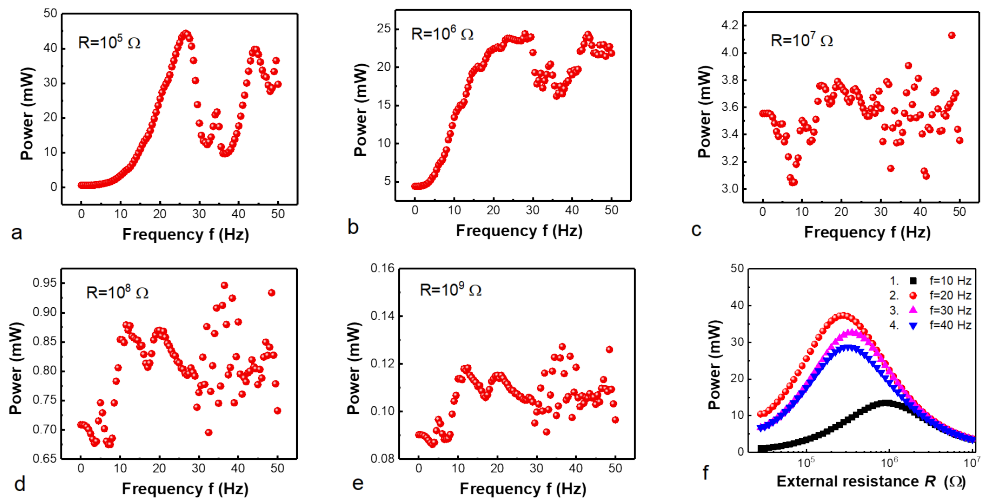

Figure S3 Output power response under different excitation frequencies and external resistance R is (a) $10^5$ , (b) $10^6$ , (c) $10^7$ , (d) $10^8$ , (e) $10^9$ , (f) $10^4$ - $10^7$ , Unit: Ohm.

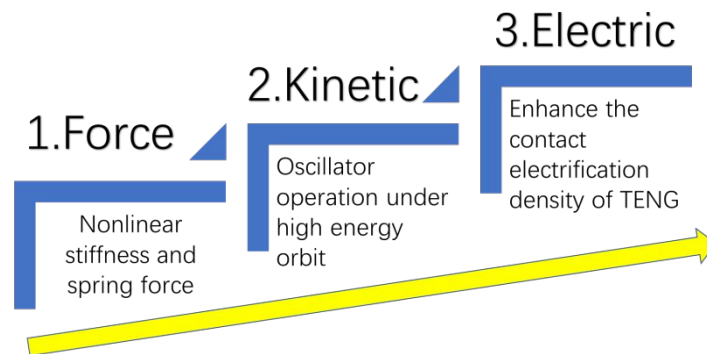

Figure S4. Mechanism for improving output of the nonlinear oscillator.

Video S1: Power the calculator (MP4).

Video S2: Lighting up 80 yellow LEDs in series connection by shaker (MP4).
